# Supplementary material for: Molecular insights on TNKS1/TNKS2 and inhibitor-IWR1 interactions
Source: Royal Society of Chemistry journal article supplement (doi:10.1039/c3mb70305c), 2013-10-23
Supplement: c3mb70305c.pdf [file c3mb70305c.pdf]

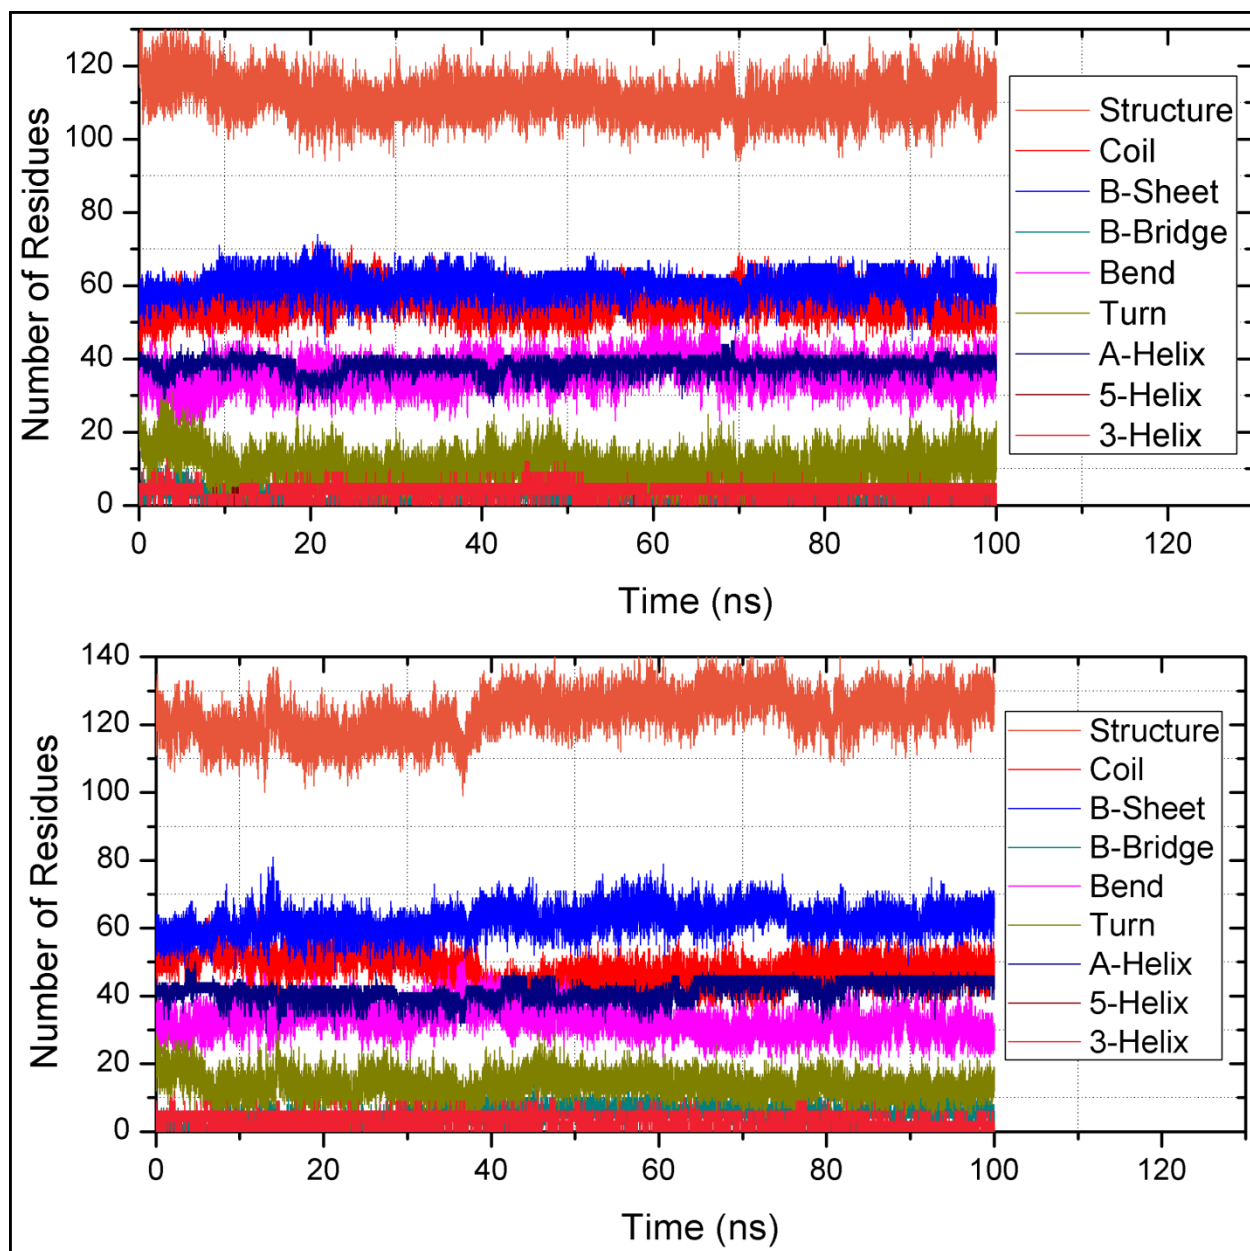

**Figure S1:** The secondary structure of TNKS1/2 complexes over the course of simulation. It includes the coil,  $\beta$ -sheet,  $\beta$ -bridge, bend, turn,  $\alpha$ -helix, 5-helix and 3-helix (indicated in different colors).
